# Supplementary material for: Biallelic EPCAM deletions induce tissue-specific DNA repair deficiency and cancer predisposition
Source: PubMed Central journal article supplement (PMC10928233; doi:10.1038/s41698-024-00537-6), 2024-03-11
Supplement: 41698_2024_537_MOESM1_ESM.pdf [file 41698_2024_537_MOESM1_ESM.pdf]

**a**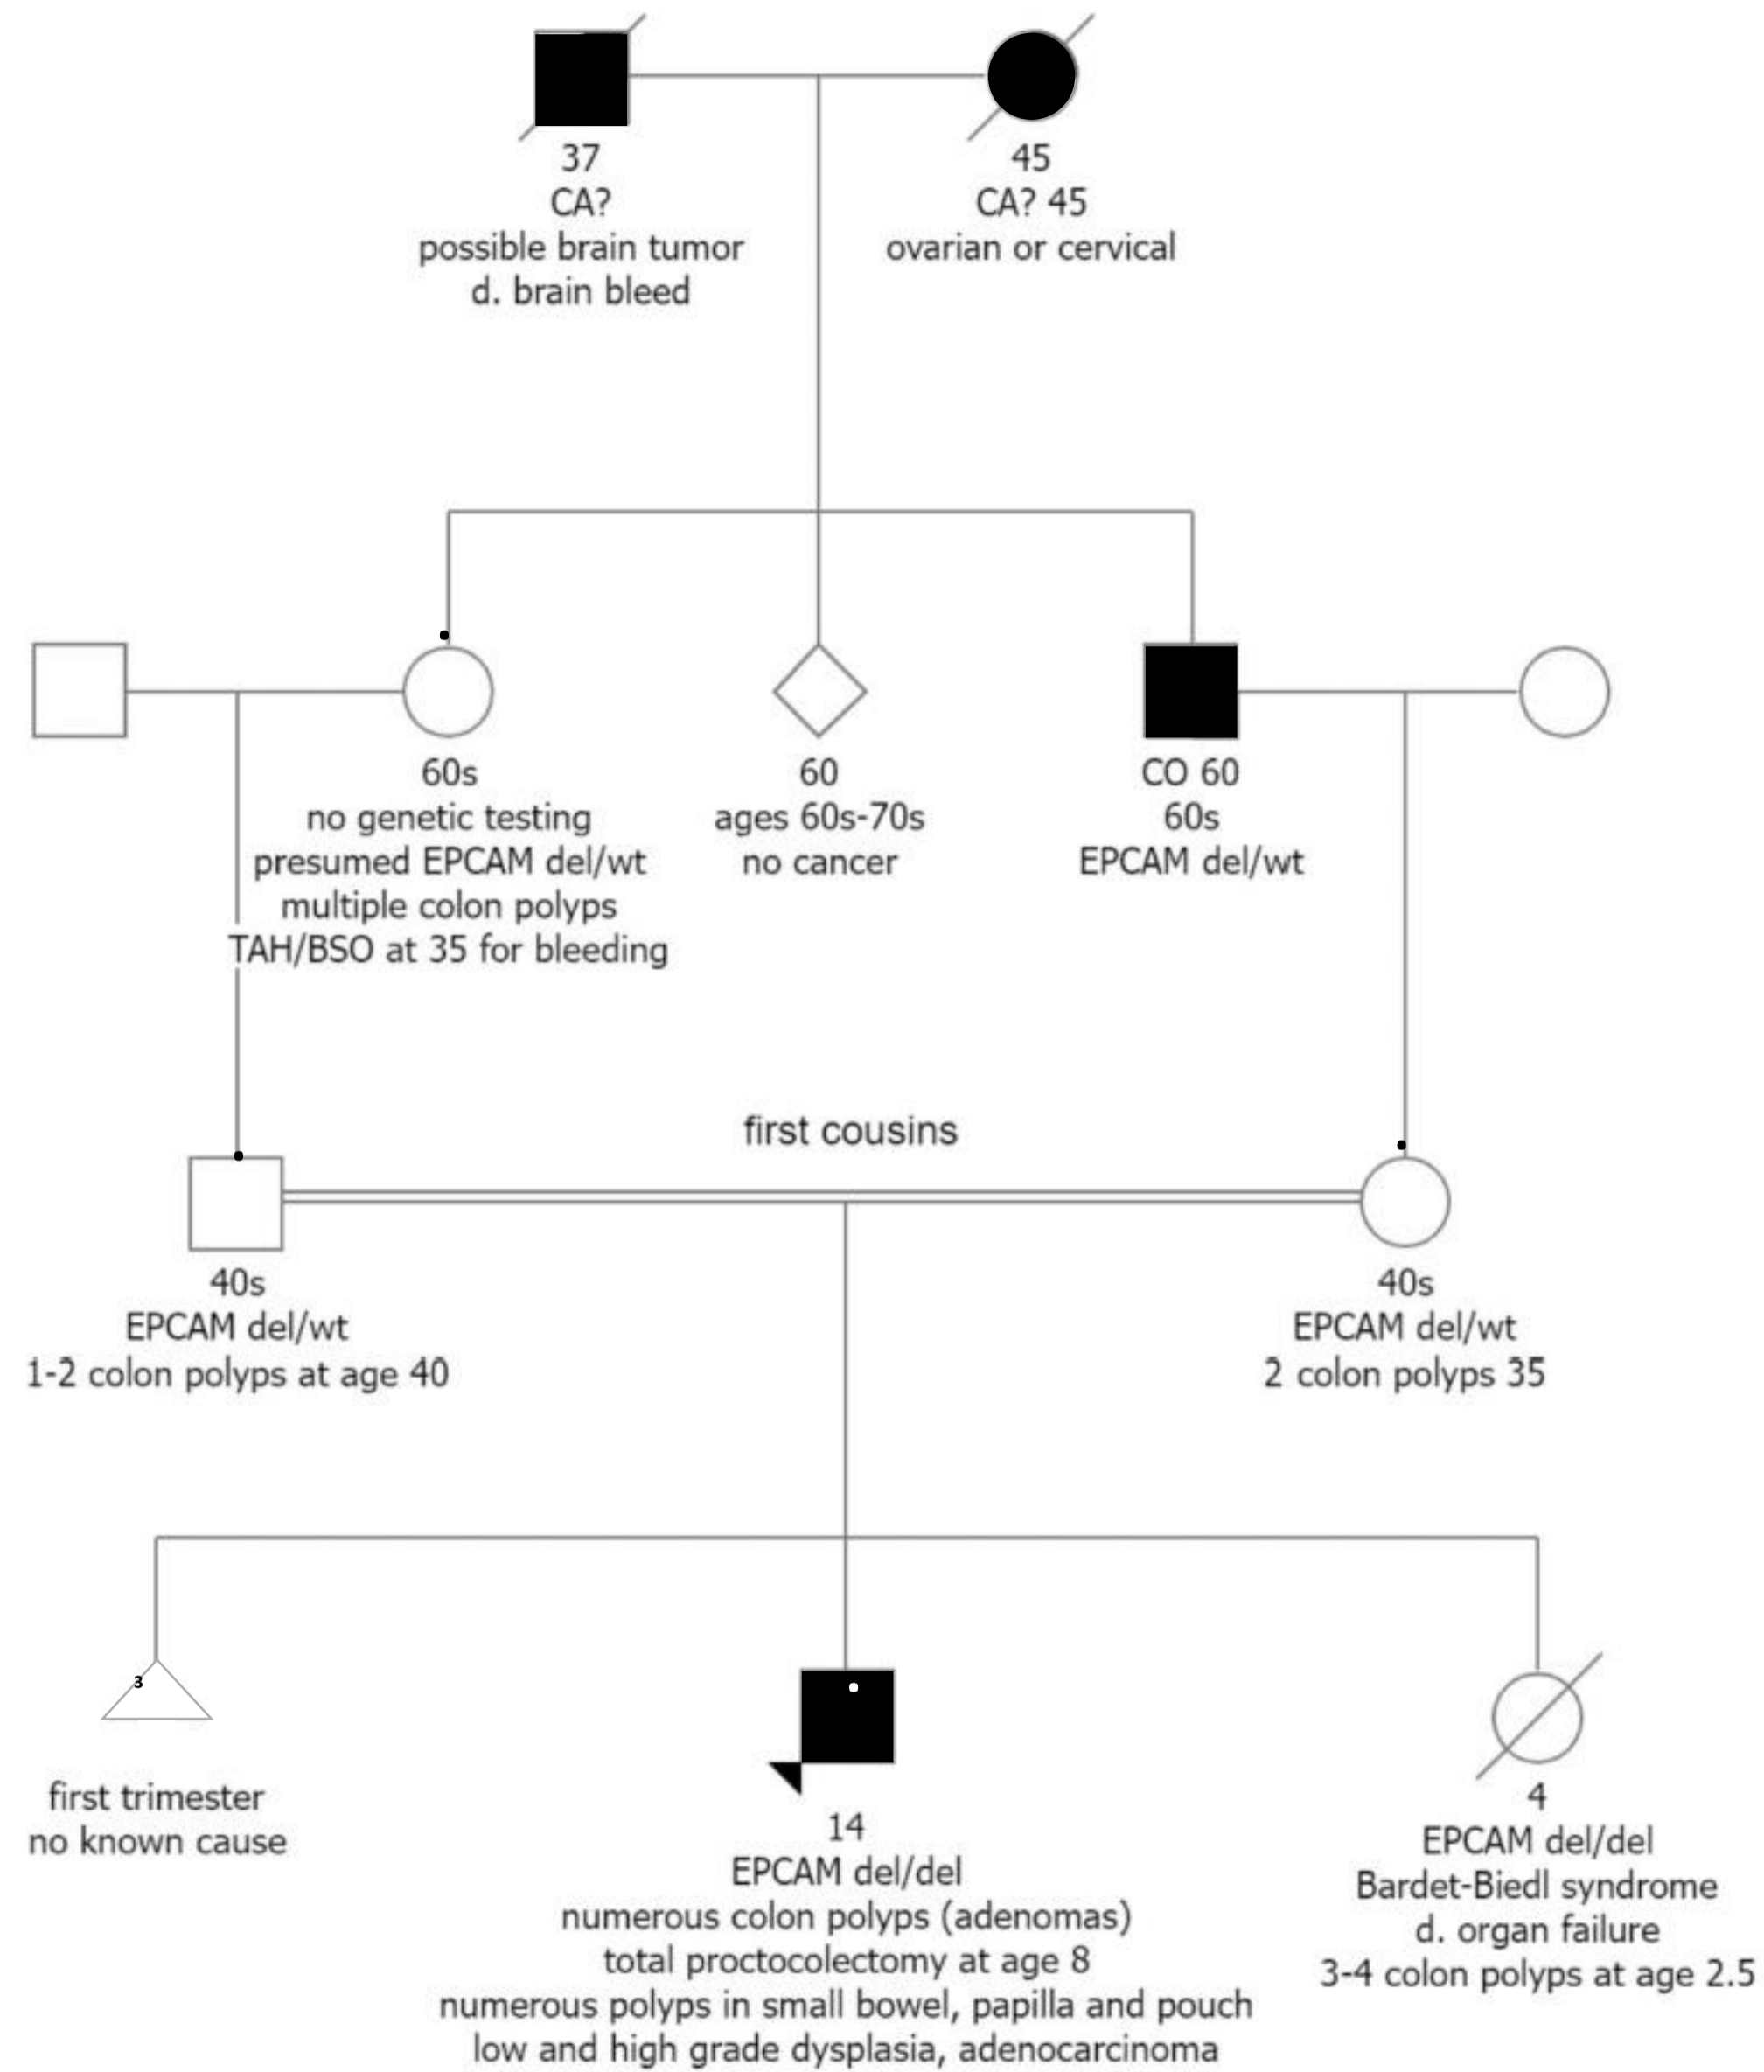**b**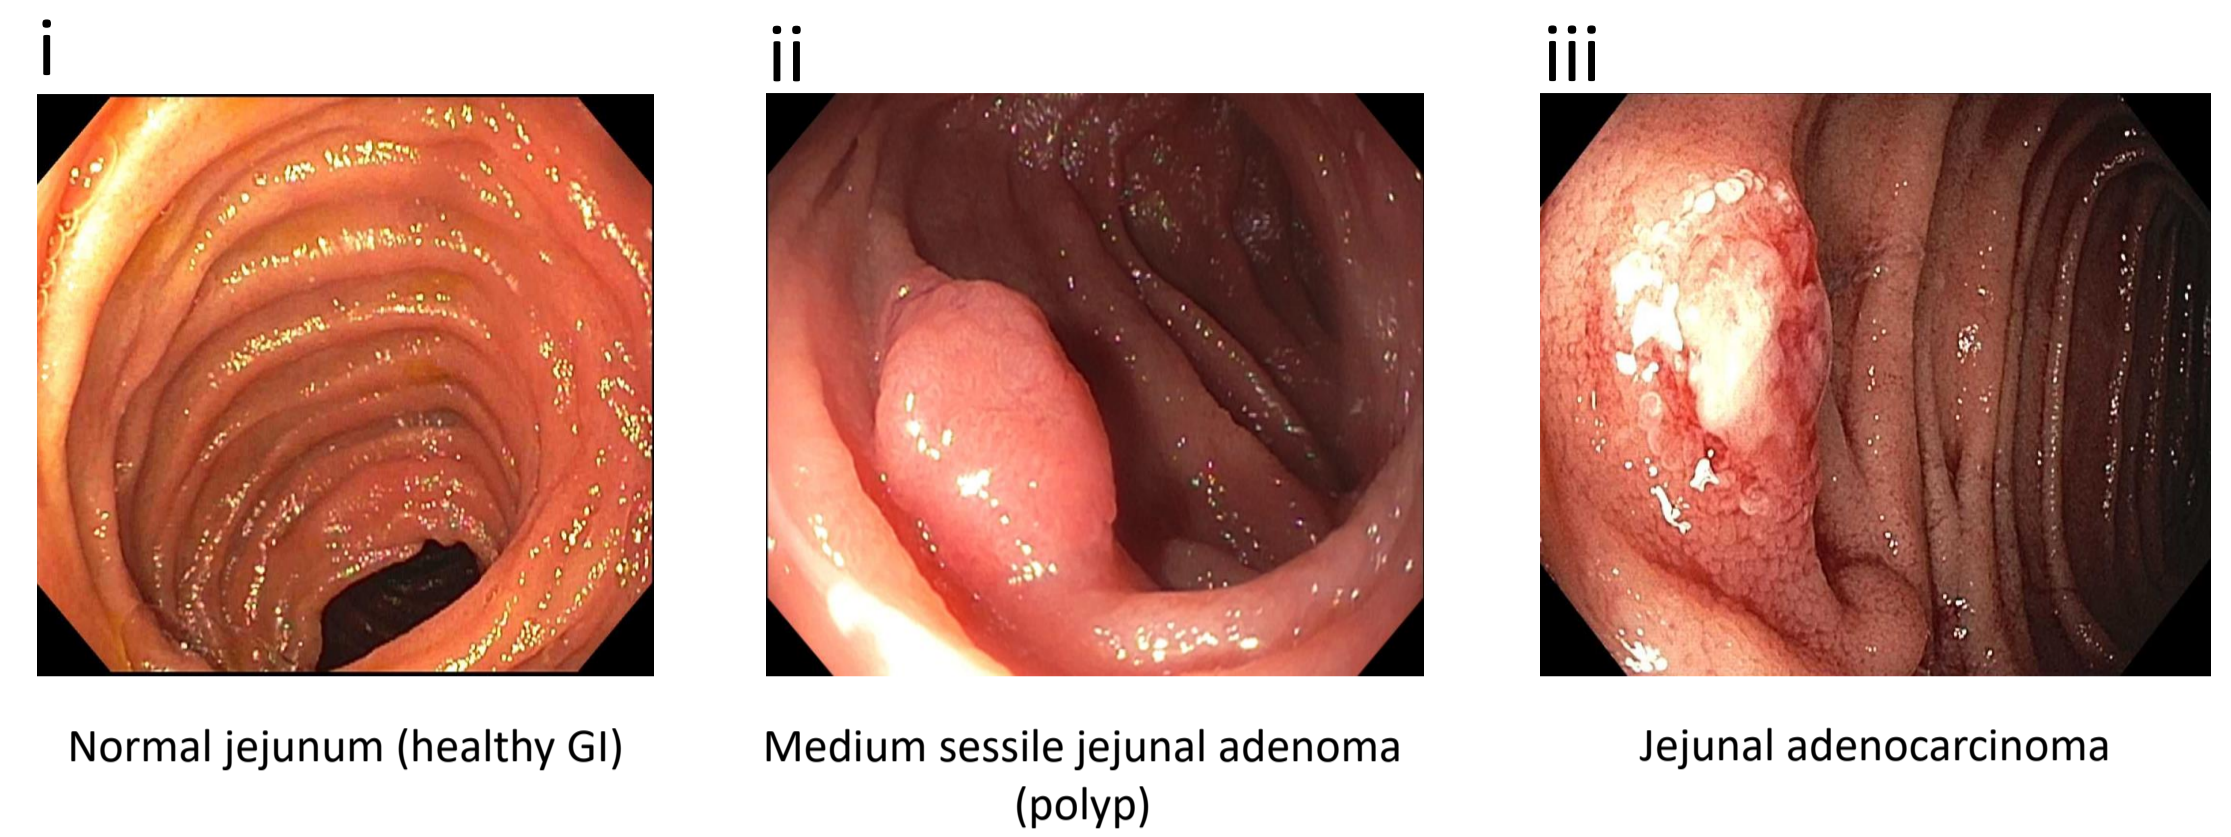

**Supplementary Figure 1:** **a:** Pedigree of the proband and extended family. Proband is marked by an arrow. **b:** Scope pictures showing healthy GI tissue (normal jejunum), polyp (medium sessile jejunal adenoma) and jejunal adenocarcinoma.
